# Supplementary material for: Object Detection as an Aid for Locating the Prostate in Surface-Based Abdominal Ultrasound Images
Source: Research Square preprint supplement (doi:10.21203/rs.3.rs-6211216/v1), 2025-03-26
Supplement: Supplementary file 1 [file d76e7095c51a6a25440826ca.docx]

Object Detection as an Aid for Locating the Prostate in Surface-Based Abdominal Ultrasound Images – Supplementary Material

Rory Douglas Bennett1, Tristan Barrett2, Vincent J. Gnanapragasam2, Zion Tsz Ho Tse1, *

1School of Engineering and Materials Science, Queen Mary University of London, Mile End Road, London, UK, E1 4NS.

2Department of Radiology, University of Cambridge School of Clinical Medicine, Cambridge, UK, CB2 0QQ.

[*z.tse@qmul.ac.uk](mailto:*z.tse@qmul.ac.uk)

Supplementary Table : Training setups used for all models.

| **Python** | **PyTorch** | **GPU** |
| --- | --- | --- |
| 3.10 | 2.5.1+ cu124 | HPC Assigned  Tesla  Ampere |

Supplementary Table : Testing setup used for all models. All speed tests were conducted on this system.

| **Python** | **PyTorch** | **GPU** |
| --- | --- | --- |
| 3.12 | 2.5.1+cu124 | nVidia 4060 Laptop (6GB VRAM) |

Supplementary Table : Parameter values used during training of the YOLO models. Any parameters not in this list had default values used.

| **Parameter** | **Value** |
| --- | --- |
| epochs | 1000 |
| imgsz | 600 |
| pretrained | False |
| batch | 8 |
| cos_lr | True |
| patience | 100 |
| val | True |
| shear | 15 |
| mosaic | 0 |
| fliplr | 0.2 |
| scale | 0.3 |
| dropout | 0.2 |
| hsv_h | 0 |
| hsv_s | 0 |
| hsv_v | 0 |
| degrees | 30 |
| translate | 0.2 |
| erasing | 0.5 |

Supplementary Table : RetinaNet and FasterRCNN parameters used during training. Transformer parameters start from Random Erasing.

| **Parameter** | **Value** |
| --- | --- |
| epochs | 1000 |
| imgsz | 600 |
| pretrained | False |
| batch | 32 |
| patience | 100 |
| Oversampling Factor | 8 |
| Gradient Clipping | True |
| Optimiser | Stochastic Gradient Descent |
| Optimiser Learning Rate | 0.01 |
| Optimiser Momentum | 0.9 |
| Optimiser Weight Decay | 0.005 |
| Learning Rate Schedular | Cosine Annealing with Warm Restarts |
| Learning Rate Schedular Restart | 1000 |
| Random Erasing | Probability=0.5; scale=(0.02, 0.08) |
| Random Affine | degrees=30; shear=15; translate=(0.1, 0.1); scale=(0.8, 1.1) |
| Random Horizontal Flip | Probability=0.2 |
| Gaussian Noise | mean=0.5; sigma=0.1 |
| Gaussian Blur | 5x5 matrix |
